# Supplementary material
Source: PubMed Central journal article supplement (PMC2796082)

# Mendoza et al., Figure 1 Supplementary

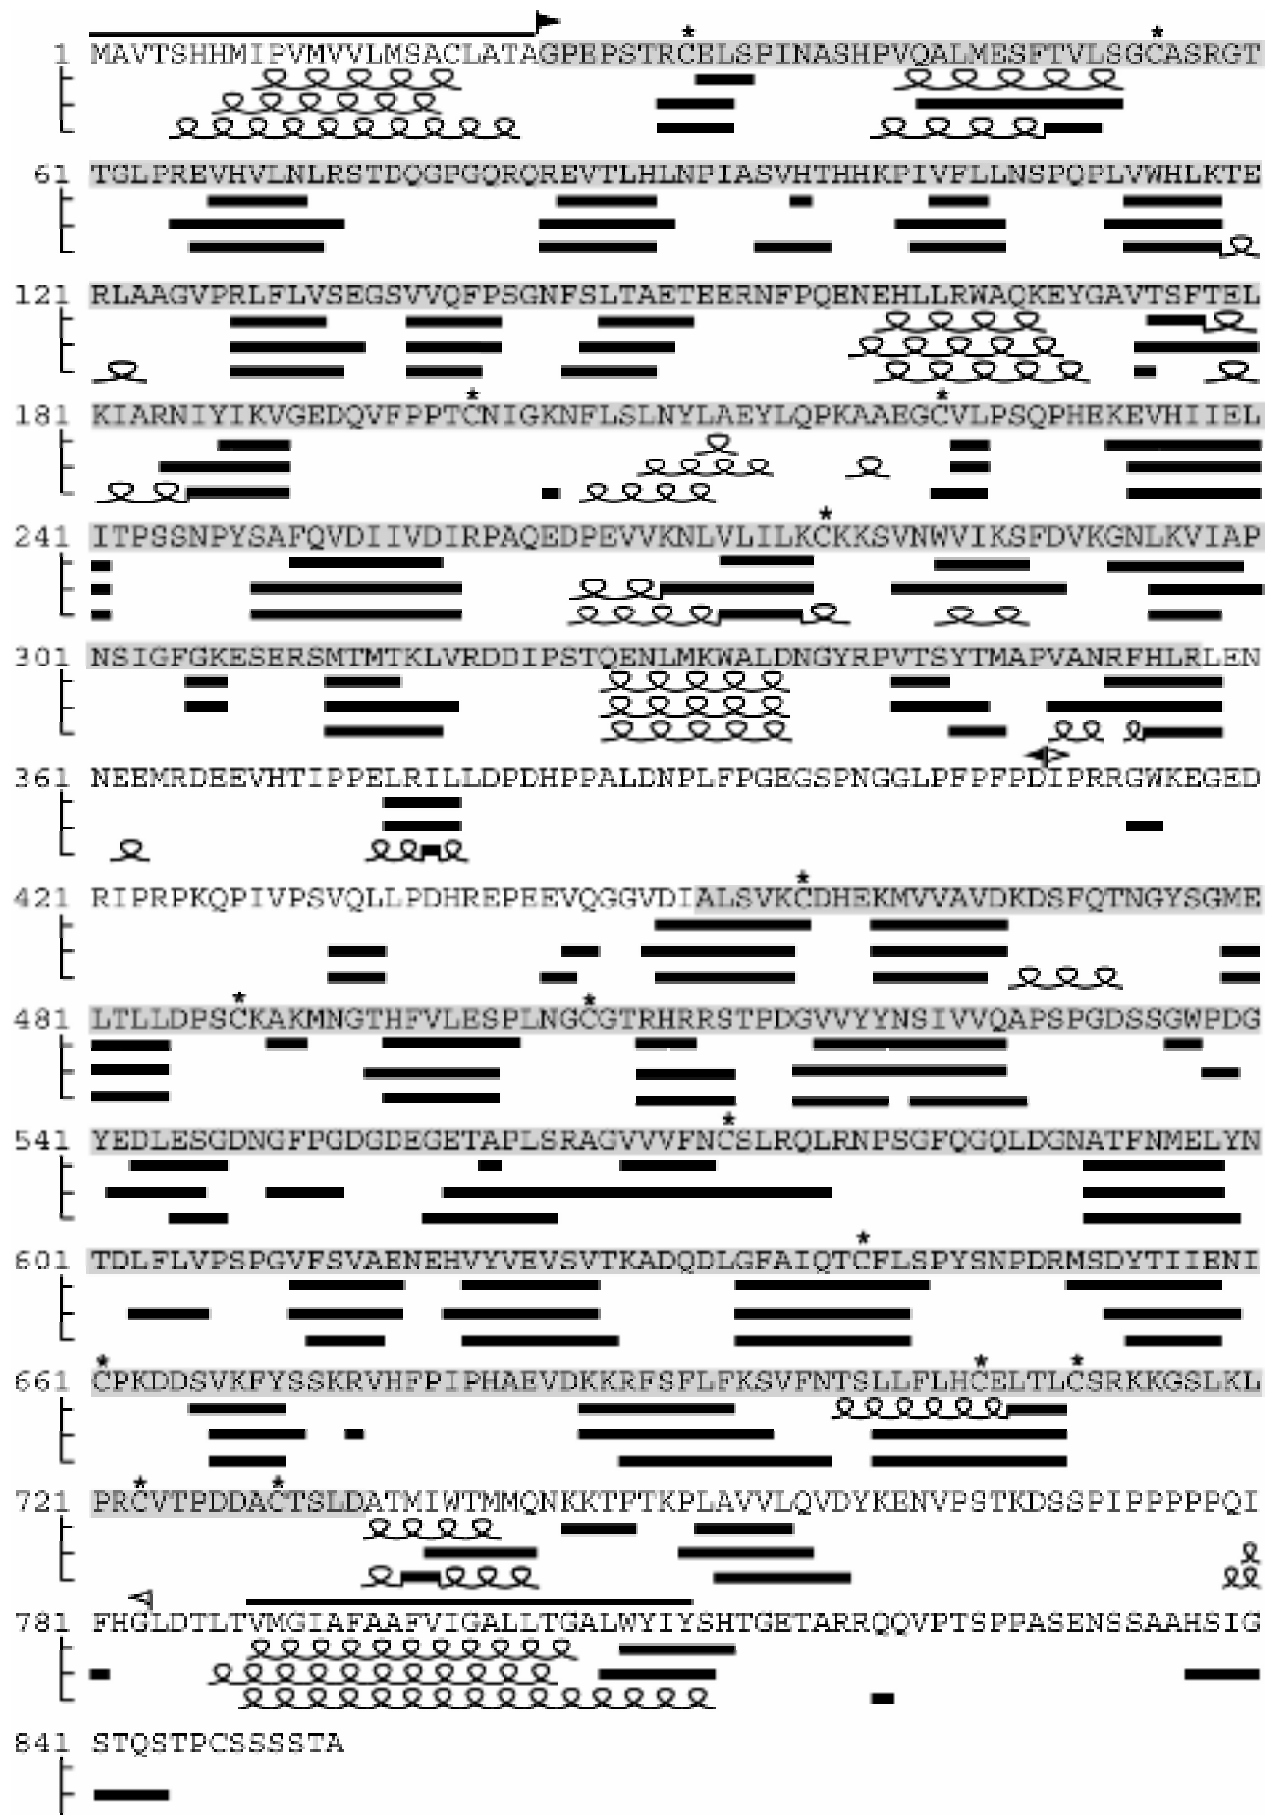

## Mendoza et al., Figure 2 Supplementary

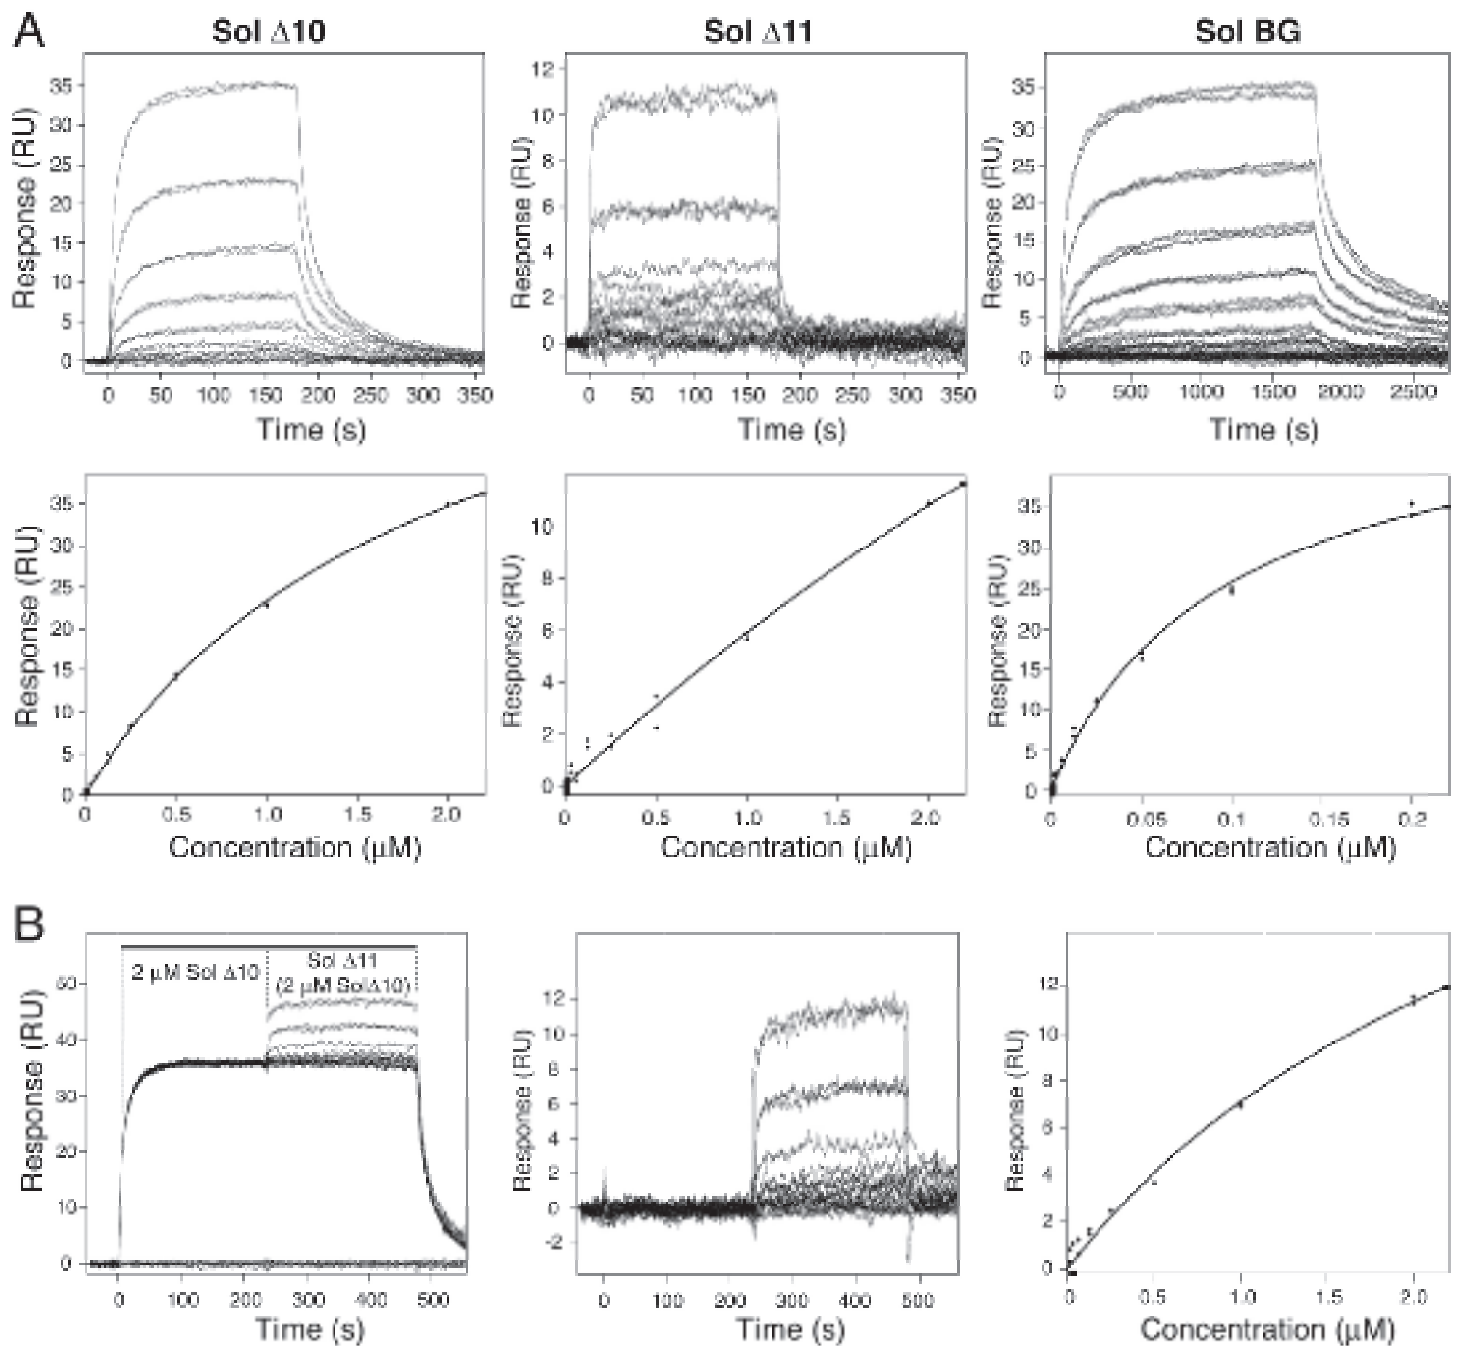

# Mendoza et al., Figure 3 Supplementary

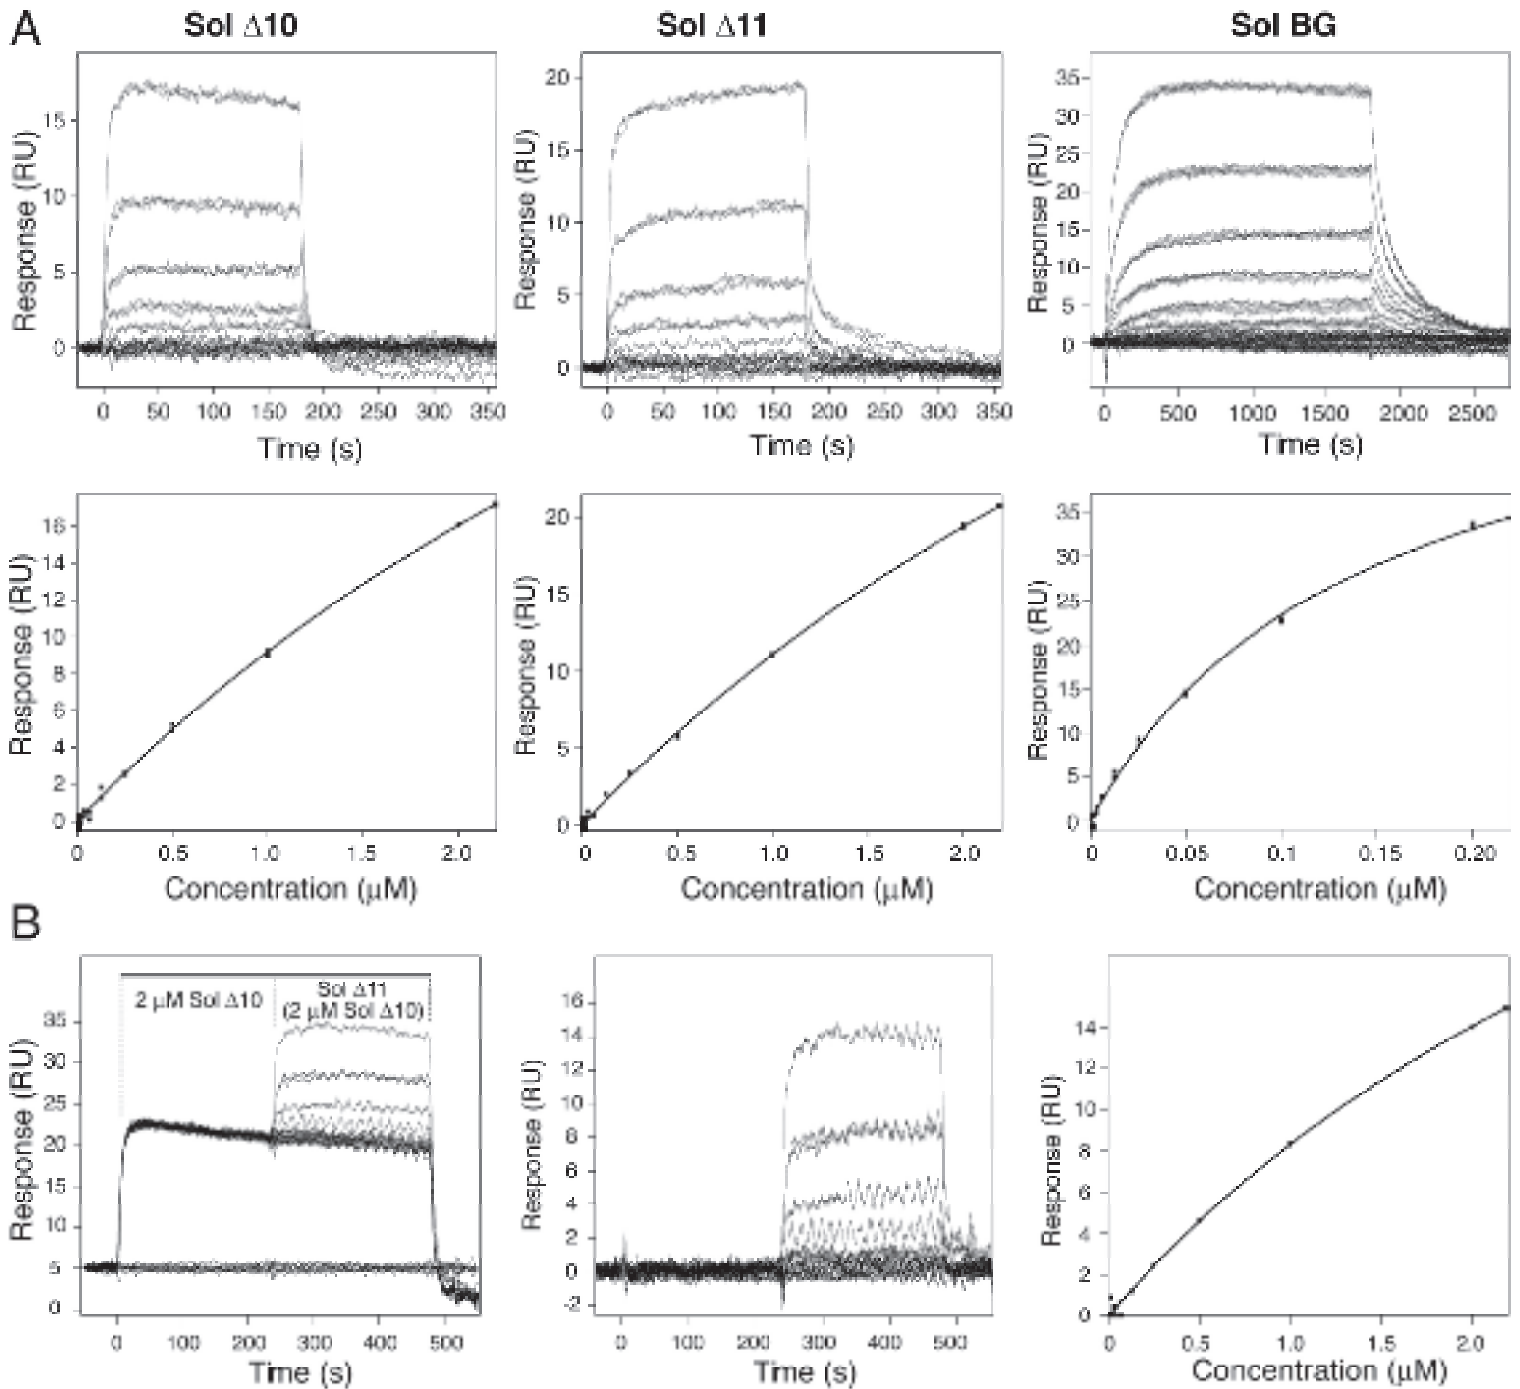

Supplement: NIHMS160014-supplement-1_si_001.pdf [file NIHMS160014-supplement-1_si_001.pdf]
